# Supplementary material for: Tyro3 Modulates Mertk-Associated Retinal Degeneration
Source: PubMed Central journal article supplement (PMC4687644; doi:10.1371/journal.pgen.1005723), 2015-12-11

## S2 Figure

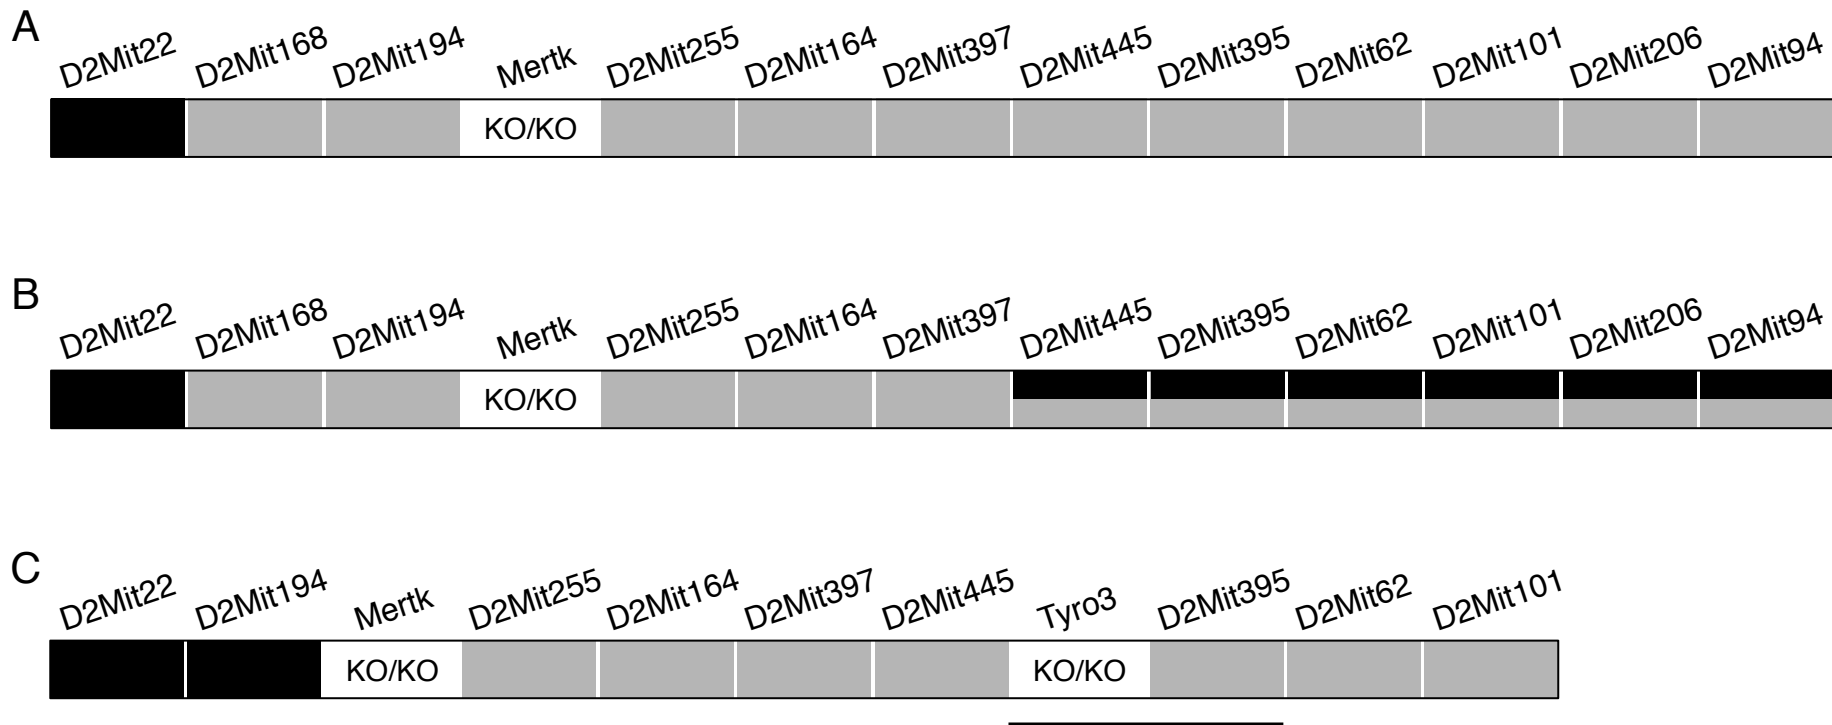

Supplement: pgen.1005723.s002.pdf [file pgen.1005723.s002.pdf]
