# Supplementary material for: Tyro3 Modulates Mertk-Associated Retinal Degeneration
Source: PubMed Central journal article supplement (PMC4687644; doi:10.1371/journal.pgen.1005723), 2015-12-11
Supplement: pgen.1005723.s005.pdf [file pgen.1005723.s005.pdf]

## S1 Table

| Mouse gene   | Human gene                          |
|--------------|-------------------------------------|
| Phgr1        | PHGR1                               |
| Disp2        | DISP2                               |
| Knstrn       | KNSTRN                              |
| Ivd          | IVD                                 |
| BHS1         | BAHD1                               |
| Chst14       | CHST14                              |
| Ccdc32       | C15orf57                            |
| Rpusd2       | RPUSD2                              |
| Casc5        | CASC5                               |
| Rad51        | RAD51                               |
| Rmdn3        | RMDN3                               |
| Gchfr        | GCHFR                               |
| DnaJc17      | DNAJC17                             |
| Gm14137      | C15orf62                            |
| Zfyve19      | ZFYVE19                             |
| Ppp1r14d     | PPP1R14D                            |
| Spint1       | SPINT1                              |
| Rhov         | RHOV                                |
| Vps18        | VPS18                               |
| Dll4         | DLL4                                |
| Chac1        | CHAC1                               |
| Ino80        | INO80                               |
| Exd1         | EXD1                                |
| Chp1         | CHP                                 |
| Oip5         | OIP5                                |
| Nusap1       | NUSAP1                              |
| Ndufaf1      | NDUFAF1                             |
| Rtf1         | RTF1                                |
| Itpka        | ITPKA                               |
| Ltk          | LTK                                 |
| Rpap1        | RPAP1                               |
| <b>Tyro3</b> | <b>TYRO3</b>                        |
| Mga          | MGA                                 |
| Mapkbp1      | MAPKBP1                             |
| Pla2g4b      | PLA2G4B                             |
| Jmjd7        | JMJD7                               |
| Ehd4         | EHD4                                |
| Pla2g4e      | PLA2G4E                             |
| Pla2g4d      | PLA2G4D                             |
| Pla2g4f      | PLA2G4F                             |
| Vps39        | VPS39                               |
| Tmem87a      | TMEM87A                             |
| Ganc         | GANC                                |
| Capn3        | CAPN3                               |
| Zfp106       | ZFP106                              |
| Snap23       | SNAP23                              |
| Lrrc57       | LRRC57                              |
| Haus2        | HAUS2                               |
| Stard9       | STARD9                              |
| Cdan1        | CDAN1                               |
| AK087617     | inferred unnamed protein            |
| mKIAA1300    | hypothetical serine rich            |
| AB001425     | motor domain of KIF16A, partial cds |
