# Supplementary material for: Tyro3 Modulates Mertk-Associated Retinal Degeneration
Source: PubMed Central journal article supplement (PMC4687644; doi:10.1371/journal.pgen.1005723), 2015-12-11
Supplement: pgen.1005723.s006.pdf [file pgen.1005723.s006.pdf]

|   |           |       |             |   |   |   |   |   |   |   |   |   |   |   |   |   |   |
|---|-----------|-------|-------------|---|---|---|---|---|---|---|---|---|---|---|---|---|---|
| 2 | 119809346 | Tyro3 | rs47104675  | A | - | - | G | G | G | G | G | G | G | G | G | G | G |
| 2 | 119809348 | Tyro3 | rs259818895 | C | - | - | T | - | - | - | T | - | - | - | T | - | - |
| 2 | 119809583 | Tyro3 | rs49435215  | C | - | - | T | T | T | T | T | T | T | T | T | T | T |
| 2 | 119809620 | Tyro3 | rs49869472  | A | - | - | T | T | - | T | T | - | T | T | - | T | T |
| 2 | 119809755 | Tyro3 | rs265189593 | C | - | - | T | T | T | T | T | T | T | T | T | T | T |
| 2 | 119809756 | Tyro3 | rs229413765 | A | - | - | G | G | G | G | G | G | G | G | G | G | G |
| 2 | 119809757 | Tyro3 | rs249059828 | T | - | - | C | C | C | C | C | C | C | C | C | C | C |
| 2 | 119809820 | Tyro3 | rs50990498  | C | - | - | T | T | T | T | T | T | T | T | T | T | T |
| 2 | 119809832 | Tyro3 | rs46155772  | G | - | - | - | A | - | A | - | - | - | A | - | - | - |
| 2 | 119809898 | Tyro3 | rs48728041  | T | - | - | C | C | C | C | C | C | C | C | C | C | C |
| 2 | 119810451 | Tyro3 | rs4136004   | C | - | - | T | - | T | - | T | T | - | T | T | T | T |
| 2 | 119810913 | Tyro3 | rs27424661  | C | - | - | - | - | T | - | - | - | - | T | - | - | T |
| 2 | 119810952 | Tyro3 | rs27424660  | C | - | - | - | T | - | T | - | - | - | T | - | - | - |
| 2 | 119811012 | Tyro3 | rs27424659  | G | - | - | - | - | A | - | - | - | - | - | A | - | A |
| 2 | 119811112 | Tyro3 | rs46218373  | G | - | - | - | A | - | A | - | - | - | A | - | - | - |
| 2 | 119811187 | Tyro3 | rs27424658  | G | - | - | - | - | A | - | A | - | - | A | - | A | A |
| 2 | 119811196 | Tyro3 | rs27424657  | G | - | - | A | A | A | A | A | A | A | A | A | A | A |
| 2 | 119811220 | Tyro3 | rs27424656  | C | - | - | A | A | A | A | A | A | A | A | A | A | A |
| 2 | 119811346 | Tyro3 | rs45988723  | C | - | - | T | T | T | T | T | T | T | T | T | T | T |
| 2 | 119811356 | Tyro3 | rs46825732  | C | - | - | T | T | T | T | T | T | T | T | T | T | T |
| 2 | 119811366 | Tyro3 | rs47585089  | G | - | - | C | C | C | C | C | C | C | C | C | C | C |
| 2 | 119811410 | Tyro3 | rs46481213  | C | - | - | T | T | T | T | T | T | T | T | T | T | T |
| 2 | 119811552 | Tyro3 | rs45849779  | G | - | - | C | C | C | C | C | C | C | C | C | C | C |
| 2 | 119811883 | Tyro3 | rs27424655  | A | - | - | T | - | T | - | T | T | - | T | T | T | T |
| 2 | 119811973 | Tyro3 | rs27424654  | G | - | - | - | A | - | A | - | - | - | A | - | - | - |
| 2 | 119812254 | Tyro3 | rs27424653  | C | - | - | T | T | - | T | - | - | T | - | T | - | - |
| 2 | 119812397 | Tyro3 | rs27424651  | G | - | - | A | A | A | A | A | A | A | A | A | A | A |
| 2 | 119812410 | Tyro3 | rs27424650  | A | - | - | - | C | - | C | - | - | - | C | - | - | - |
| 2 | 119812556 | Tyro3 | rs13459234  | C | - | - | G | G | G | G | G | G | G | G | G | G | G |
| 2 | 119812697 | Tyro3 | rs27424649  | C | - | - | T | - | - | - | - | T | - | - | T | - | - |
| 2 | 119813146 | Tyro3 | rs251734907 | C | - | - | - | - | T | - | T | - | - | T | - | T | T |
| 2 | 119813234 | Tyro3 | rs27424648  | C | - | - | T | T | T | T | T | T | T | T | T | T | T |
| 2 | 119813443 | Tyro3 | rs33222875  | C | - | - | T | - | - | - | - | T | - | - | - | T | - |
| 2 | 119813846 | Tyro3 | rs246659726 | C | - | - | - | - | T | - | T | - | - | T | - | T | T |
| 2 | 119815246 | Tyro3 | rs27424647  | A | - | - | G | G | G | G | G | G | G | G | G | G | G |
| 2 | 119815560 | Tyro3 | rs240396163 | G | - | - | - | - | C | - | C | - | - | C | - | C | C |
| 2 | 119815715 | Tyro3 | rs253025997 | C | - | - | - | - | T | - | T | - | - | T | - | T | T |
| 2 | 119815935 | Tyro3 | rs33115787  | C | - | - | A | - | - | - | A | - | - | - | A | - | - |
| 2 | 119816063 | Tyro3 | rs265168874 | T | - | - | - | - | C | - | C | - | - | C | - | C | C |
| 2 | 119816386 | Tyro3 | rs51179699  | C | - | - | T | T | - | T | - | - | T | - | T | - | - |
| 2 | 119816488 | Tyro3 | rs33489247  | A | - | - | G | - | - | - | - | - | - | - | - | G | - |
| 2 | 119816626 | Tyro3 | rs27424646  | C | - | - | - | - | T | - | T | - | - | T | - | T | T |
| 2 | 119816822 | Tyro3 | rs47863852  | G | - | - | T | C | C | C | C | C | C | C | C | C | C |
| 2 | 119816824 | Tyro3 | rs48021866  | C | - | - | G | G | G | G | G | G | G | G | G | G | G |
| 2 | 119816861 | Tyro3 | rs13459232  | G | - | - | - | - | A | - | A | - | - | A | - | A | A |
| 2 | 119817077 | Tyro3 | rs27424645  | G | - | - | A | - | - | - | - | - | - | - | - | A | - |
| 2 | 119817081 | Tyro3 | rs27424644  | T | - | - | - | C | - | C | - | - | - | C | - | - | - |
| 2 | 119817664 | Tyro3 | rs33708304  | G | - | - | - | C | - | C | - | - | - | C | - | - | - |
| 2 | 119817684 | Tyro3 | rs27424643  | G | - | - | A | - | - | - | - | - | - | - | - | A | - |
| 2 | 119817696 | Tyro3 | rs13459231  | C | - | - | - | - | T | - | T | - | - | T | - | T | T |
| 2 | 119817751 | Tyro3 | rs13459233  | T | - | - | C | C | C | C | C | C | C | C | C | C | C |
| 2 | 119818007 | Tyro3 | rs27424642  | T | - | - | C | C | C | C | C | C | C | C | C | C | C |

data were downloaded from <http://www.sanger.ac.uk/resources/mouse/genomes/>

'-' indicates identity with C57BL/6 reference

MOLF is identical to B6 at 142 of 144 positions; PWK is identical at 135 of 144 positions; 129P2 is identical at 44 of 144 positions.

Highlighted are 89 positions at which the B6 reference and MOLF (and sometimes PWK) share an allele that is different from the allele present in most or all other strains in the table.
