# Supplementary material for: Tyro3 Modulates Mertk-Associated Retinal Degeneration
Source: PubMed Central journal article supplement (PMC4687644; doi:10.1371/journal.pgen.1005723), 2015-12-11
Supplement: pgen.1005723.s007.pdf [file pgen.1005723.s007.pdf]

**S3 Table**

| <b>STR</b>                      | <b>Forward Primer</b>      | <b>Reverse Primer</b>       |
|---------------------------------|----------------------------|-----------------------------|
| D2Mit22                         | GCTCCCTTTCCTCTTGAACC       | GGGCCCTTATTCTATCTCCC        |
| D2Mit168                        | CTCACAGACACTGCACTATTACACA  | TGTTCTGCTATTGTTTTGGG        |
| D2Mit194                        | TGGAATTCCAAAGTCAAGGG       | GGGAAGAATGGGGGAAGTTA        |
| D2Mit255                        | GCAAGTGTGATCTGGGTGC        | TGAGCACACTTACACTGTGGTG      |
| D2Mit164                        | TCTCTGCTAATTAAGTTGAAGAGTGC | ACCAGTGTGTGTTTTGTATGATGTG   |
| D2Mit397                        | TGATGAAGGTTCTTTTTCTCCC     | CCACAGTTGGTAATTATCTGGC      |
| D2Mit445                        | CCTATACACGCACACACAGACA     | ATGCCCTGCTTGCTATTGTT        |
| D2Mit395                        | AGGTCAGCCTGGACTATATGG      | AGCATCCATGGGATAATGGT        |
| D2Mit62                         | GGATACCGTTTGGAAAGTAAACC    | GCAAGAAGCACAGGAGGC          |
| D2Mit101                        | ATAATTCCTGATTTGCTGTTTGTG   | ACATGAAGCCTAGAGGGTGC        |
| D2Mit206                        | TGTCAGAACTGGACAATGTCG      | ATGATAACAGACACTAATGATTAGGGC |
| D2Mit94                         | GGCTTCGACCCTGGTTTTAG       | TGAAAGTTCAGATGACCACAGG      |
| <b>SNP</b>                      |                            |                             |
| rs27439123                      | ACTGGTGAGGTTAGCTGTGC       | TCTTCCCTCTGTTGCCTAAG        |
| rs27454014                      | GGGGTACTGCACTGAACAAG       | ACCTCTTGCATGGCTTCTC         |
| rs3669873                       | TATACTTCCACCCCAAAAGG       | TCAGCCCTTCAGCTCTTTTA        |
| rs27443946                      | CCCAGCAACTCACTTAGCAT       | CTTGCTCGGCTACCTTTTT         |
| rs3686523                       | GGAGTCTATGGGGGAAGAGA       | GCATGCATCTTAGTCCCTGA        |
| rs8240210                       | CTGCTGCTCAGGAGAATCC        | GCACAGTAGGGCACTCCATAAA      |
| rs27424653 <sup>†</sup>         | GGAGGCACTGTTGCAGATAC       | AAATTTCTTCCCGCTAAAGG        |
| rs3684717                       | TTGGCTTTGGTCCTTCTG         | TGCATGCAAATGGTTTTAG         |
| rs27440128                      | TTCTTCTCTTCCCTGCCCTGT      | ACCTCCCGTACTTGTTCCT         |
| rs3144592                       | AAGCTGGATCCTTGCTGTG        | AGAGCCCAGCTCAGTGTTAG        |
| rs3144638                       | CAGATGAGCACTGTTTGTGTG      | CTACAGCTGGGAAATTCAGG        |
| rs3702275                       | CAGAGAAGCTGCCAAAAGAG       | GAGGACAATGTTCAAGGATG        |
| rs27427063                      | GCCTGCTGATCTCTTTTGTG       | TTTGGTGTGCTCAGTGTG          |
| rs27504920                      | CCCCCAGTAATTGTGCTAAG       | TGGTCTATTCAGGCAATTATGAC     |
|                                 |                            |                             |
| <b><i>mTyro3</i> f</b>          |                            |                             |
| <b>sequencing</b>               |                            |                             |
| 5002; 4816                      | ATGGCGCTGAGGCGGAGCAT       | ACAGCTGAAAAGGGGCATT         |
| 4817; 4156                      | GAAGATGACCGTGTCTCAGG       | TGCTTGAAGGCGAACAATGG        |
| 5026; 4818                      | GTCGAAGGTGTGCCATTCTT       | GAAATTCTGAGGAGCTCTGG        |
| 4819; 4820                      | AACGATCTCCAGCTACAACG       | GCTTTTCTTCAATTCATCG         |
| 5028; 5035                      | CATCCTGCTTCGGAAGAGAC       | CTTCACTGCCACTTTCACGA        |
| 5046; 5045                      | CGATGAATTGAAGGAAAAGC       | CCAAAATCAGCCACACACAC        |
| 4823; 4824                      | TTGCATGAAGGAGTTTGACC       | AGATGTACCGAGAGTCACTGG       |
| 5029; 5042                      | CCATATGCTGGCATTGAAAA       | GGGCTGAAGATGTACCGAGA        |
| 4825; 4826                      | TGCCGAGATTTACAACCTACC      | TGCTACCCTCCCTTACTGC         |
|                                 |                            |                             |
| <b>qRT-PCR f</b>                |                            |                             |
| 4493; 4494                      | GTGAAGCCCGCAACATAA         | CAGTACAGGAATGCAGCAGA        |
| 4670; 4671<br>( <i>Eef1a1</i> ) | GCAGAAGAAAAGGCAATGGT       | AGGCCGTAGTACAGCAGGAT        |

fVollrath lab identifiers

† near *mTyro3* exon 15
