# Supplementary material for: Tyro3 Modulates Mertk-Associated Retinal Degeneration
Source: PubMed Central journal article supplement (PMC4687644; doi:10.1371/journal.pgen.1005723), 2015-12-11
Supplement: pgen.1005723.s008.pdf [file pgen.1005723.s008.pdf]

**S4 Table**

| <b>SNP/STR</b> | <b>chr2 coordinates*</b> | <b>Notes†</b>   |
|----------------|--------------------------|-----------------|
| D2Mit22        | 151799041                | rs262340220     |
| D2Mit168       | 144822124                | rs264258584     |
| D2Mit194       | 143931545                | rs227522187     |
| <i>Mertk</i>   | 128698997-128802188      | full transcript |
| D2Mit255       | 123391787                | rs227455427     |
| D2Mit164       | 123390079                | rs260314159     |
| D2Mit397       | 122826629                | rs257766288     |
| rs27439123     | 122024278                | <b>C/T</b>      |
| rs27454014     | 121655895                | <b>A/T</b>      |
| D2Mit445       | 121297614                | rs226388668     |
| rs3669873      | 120791045                | <b>C/T</b>      |
| rs27443946     | 120417283                | <b>T/G</b>      |
| rs3686523      | 120044013                | <b>G/T</b>      |
| rs8240210      | 119798592                | <b>G/A</b>      |
| rs27424653     | 119812254                | <b>C/T</b>      |
| <i>Tyro3</i>   | 119797740-119818103      | full transcript |
| D2Mit395       | 119524934                | rs253737247     |
| rs3684717      | 119069944                | <b>A/G</b>      |
| rs27440128     | 118861643                | <b>G/A</b>      |
| rs3144592      | 118691878                | <b>T/G</b>      |
| rs3144638      | 118559508                | <b>A/C</b>      |
| D2Mit62        | 118112472                | rs252700598     |
| rs3702275      | 116947245                | <b>T/C</b>      |
| rs27427063     | 115818013                | <b>C/T</b>      |
| D2Mit101       | 115079497                | rs246380276     |
| rs27504920     | 112791086                | <b>G/A</b>      |
| D2Mit206       | 106909940                | rs236046102     |
| D2Mit94        | 80175611                 | rs244364794     |

\* from GRCm38/mm10 Assembly

† Alleles for SNPs are shown with reference allele bolded.  
For STRs the rs# is shown.
