# Supplementary material for: Tyro3 Modulates Mertk-Associated Retinal Degeneration
Source: PubMed Central journal article supplement (PMC4687644; doi:10.1371/journal.pgen.1005723), 2015-12-11
Supplement: pgen.1005723.s009.pdf [file pgen.1005723.s009.pdf]

**S5 Table**

| <b>Antibody against</b> | <b>Source</b>    | <b>Application (origin of antigen)</b> | <b>Dilution</b> |
|-------------------------|------------------|----------------------------------------|-----------------|
| TYRO3                   | Cell Signaling   | IF (mouse)<br>IB (mouse)               | 1:50<br>1:1000  |
| TYRO3                   | abcam (ab109231) | IF (human)<br>IB (human)               | 1:200<br>1:1000 |
| RLBP1                   | John Saari       | IB (mouse)                             | 1:40,000        |
| cytokeratin             | abcam            | IF (mouse)                             | 1:100           |
| $\gamma$ -tubulin       | Sigma-Aldrich    | IB (mouse)                             | 1:5000          |
| rhodopsin (rho 4D2)     | Robert Molday    | IF (bovine)                            | 1:200           |
